# Supplementary material
Source: Springer Nature journal article supplement (https://www.springermedizin.de/resource/supplementary/12885_2010_2452_MOESM2_ESM.pdf/9461334)

(a)

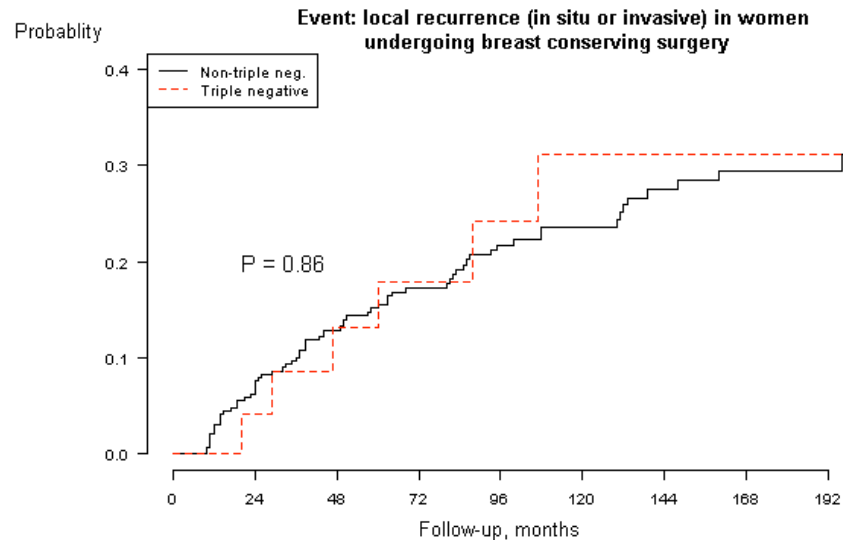

No. at risk

|                 |     |     |     |     |     |     |    |    |    |
|-----------------|-----|-----|-----|-----|-----|-----|----|----|----|
| Non-triple neg. | 290 | 266 | 235 | 184 | 146 | 107 | 78 | 62 | 47 |
| Triple negative | 24  | 22  | 19  | 14  | 12  | 8   | 7  | 5  | 3  |

(b)

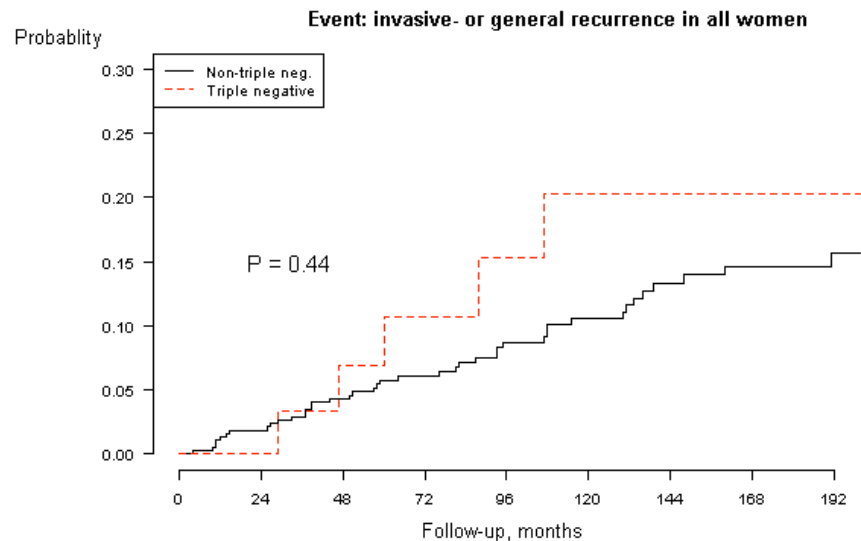

No. at risk

|                 |     |     |     |     |     |     |     |     |    |
|-----------------|-----|-----|-----|-----|-----|-----|-----|-----|----|
| Non-triple neg. | 377 | 367 | 342 | 278 | 228 | 178 | 136 | 112 | 85 |
| Triple negative | 32  | 30  | 26  | 20  | 18  | 14  | 12  | 9   | 6  |

Supplement: MOESM2 [file 9461334]
